# Supplementary material for: Deleterious effects of dialysis emergency start, insights from the French REIN registry
Source: Springer Nature journal article supplement (doi:10.1186/s12882-018-1036-9), 2018-09-17
Supplement: MOESM1 [file 16130198]

Table S1. Factors associated with three-year mortality on univariate analysis in 2012 incident patients (imputed dataset).

| <b>Univariate Cox model</b>                      | <b>HR</b> | <b>95% CI</b> | <b>p</b> |
|--------------------------------------------------|-----------|---------------|----------|
| <b>Women (vs Men)</b>                            | 0.91      | 0.84-0.98     | 0.011    |
| <b>Age (vs 18-45 years)</b>                      |           |               |          |
| 45-60                                            | 2.97      | 2.17-4.07     | <0.001   |
| 60-75                                            | 6.90      | 5.15-9.25     | <0.001   |
| ≥75                                              | 13.02     | 9.75-17.4     | <0.001   |
| <b>Albumin &lt;30 (vs ≥30 g/dl)</b>              | 1.81      | 1.66-1.96     | <0.001   |
| <b>Hemoglobin (vs [10-12] g/dl)</b>              |           |               |          |
| <10                                              | 1.23      | 1.14-1.33     | <0.001   |
| >12                                              | 0.97      | 0.86-1.10     | 0.657    |
| <b>Smoking status (vs never smoker)</b>          |           |               |          |
| Current/former smoker                            | 1.13      | 1.05-1.23     | 0.002    |
| <b>BMI (vs 23-25 kg/m<sup>2</sup>)</b>           |           |               |          |
| <18.5                                            | 1.17      | 0.97-1.40     | 0.092    |
| 18.5-23                                          | 1.14      | 1.02-1.29     | 0.025    |
| ≥25                                              | 0.92      | 0.83-1.02     | 0.126    |
| <b>Diabetes (vs No)</b>                          | 1.29      | 1.20-1.39     | <0.001   |
| <b>Respiratory disease (vs No)</b>               | 1.82      | 1.66-1.98     | <0.001   |
| <b>Active malignancy (vs No)</b>                 | 2.12      | 1.93-2.32     | <0.001   |
| <b>Hepatic disease (vs No)</b>                   | 1.98      | 1.65-2.38     | <0.001   |
| <b>Cardiovascular diseases (vs 0)</b>            |           |               |          |
| 1                                                | 1.91      | 1.73-2.11     | <0.001   |
| 2                                                | 2.68      | 2.42-2.97     | <0.001   |
| ≥ 3                                              | 3.37      | 3.06-3.71     | <0.001   |
| <b>Walking disability (vs Walk without help)</b> |           |               |          |
| Totally dependent for transfers                  | 3.79      | 3.33-4.31     | <0.001   |
| Need assistance for mobility                     | 2.80      | 2.56-3.07     | <0.001   |
| <b>eGFR (vs [5-10[ ml/min/1.73m<sup>2</sup>)</b> |           |               |          |
| <5                                               | 1.25      | 1.08-1.45     | 0.003    |
| [10-15[                                          | 1.68      | 1.44-1.95     | <0.001   |
| ≥15                                              | 2.42      | 2.07-2.84     | <0.001   |
| <b>1<sup>st</sup> RRT on PD (vs HD)</b>          | 1.08      | 0.96-1.21     | 0.213    |
| <b>1<sup>st</sup> RRT on catheter (vs No)</b>    | 1.91      | 1.77-2.06     | <0.001   |
| <b>Emergency start (vs planned start)</b>        | 1.50      | 1.40-1.61     | <0.001   |

BMI: Body Mass Index; Active malignancy: solid tumors or hematological malignancies; Cardiovascular diseases: myocardial infarction, arrhythmias, coronary insufficiency, heart failure, arteritis of the lower limbs, cerebrovascular accident; RRT: Renal Replacement Therapy; PD: Peritoneal Dialysis; HD: Hemodialysis; HR: Hazard Ratio; 95%CI: 95%Confidence Interval.

Table S2. Causes of death by dialysis initiation condition in 2012 patients

| Causes of death                | 2012 PS<br>n (%) | 2012 ES<br>n (%) |
|--------------------------------|------------------|------------------|
| <b>Cardiovascular diseases</b> | 450 (22.9)       | 248 (21.6)       |
| <b>Renal diseases</b>          | 19 (1.0)         | 11 (1.0)         |
| <b>Active malignancy</b>       | 218 (11.1)       | 134 (11.7)       |
| <b>Diabetes</b>                | 3 (0.2)          | 1 (0.1)          |
| <b>Infectious disease</b>      | 232 (11.8)       | 155 (13.5)       |
| <b>Cachexia</b>                | 135 (6.9)        | 77 (6.7)         |
| <b>Hyperkaliema</b>            | 20 (1.0)         | 9 (0.8)          |
| <b>Hepatic disease</b>         | 17 (0.9)         | 3 (0.3)          |
| <b>Unexpected death</b>        | 187 (9.5)        | 102 (8.9)        |
| <b>Unknown</b>                 | 424 (21.6)       | 251 (21.8)       |
| <b>Other causes</b>            | 257 (13.1)       | 159 (13.9)       |
| Total                          | 1962 (100)       | 1150 (100)       |

Table S3. Proportion of patients with emergency start per French region, in 2006 and 2012.

| French region              | 2006        | 2012        |
|----------------------------|-------------|-------------|
|                            | N (%)       | N (%)       |
| Alsace                     | -           | 96 (31.3)   |
| Aquitaine                  | -           | 236 (50.4)  |
| Auvergne                   | 59 (34.1)   | 45 (21.3)   |
| Basse-Normandie            | 21 (12.4)   | 35 (20.3)   |
| Bourgogne                  | 44 (21.9)   | 40 (16.7)   |
| Bretagne                   | 83 (25.2)   | 80 (19.8)   |
| Centre                     | 102 (27.4)  | 175 (50.7)  |
| Champagne-Ardenne          | 80 (34.5)   | 51 (24.2)   |
| Corse                      | 19 (46.3)   | 4 (15.4)    |
| Franche-Comté              | -           | 25 (18.8)   |
| Haute-Normandie            | 60 (31.3)   | 59 (25.9)   |
| Ile-de-France              | 268 (19.8)  | 451 (26.1)  |
| Languedoc-Roussillon       | 119 (26.7)  | 151 (31.8)  |
| Limousin                   | 16 (16.2)   | 29 (26.1)   |
| Lorraine                   | 147 (49.8)  | 69 (19.5)   |
| Midi-Pyrénées              | 80 (21.9)   | 117 (30.2)  |
| Nord-Pas-de-Calais         | 207 (38.2)  | 263 (36.6)  |
| Pays de la Loire           | -           | 101 (25.1)  |
| Picardie                   | -           | 101 (40.9)  |
| Poitou-Charentes           | -           | 49 (24.7)   |
| Provence-Alpes-Côte-d'Azur | 205 (28.1)  | 244 (33.4)  |
| Rhône-Alpes                | 226 (38.7)  | 257 (34.6)  |
| Total                      | 1736 (28.4) | 2678 (30.3) |

**Appendix:** Classification of primary kidney nephropathies in the REIN registry depending on the form of renal function impairment:

| <b>Acute nephropathy<br/>(including CKD exacerbation/flare)</b>                                                                                                                                                                                                                                                                                                                                                                                                                                     | <b>Slowly progressive nephropathy</b>                                                                                                                                                                                                                                                                                                                                                                                                                                                                                                                                                                                                                                                                                                                                                                                                                                                                                                                                                          | <b>Unknown</b>                                                                                                                                                                                                                                                                                           |
|-----------------------------------------------------------------------------------------------------------------------------------------------------------------------------------------------------------------------------------------------------------------------------------------------------------------------------------------------------------------------------------------------------------------------------------------------------------------------------------------------------|------------------------------------------------------------------------------------------------------------------------------------------------------------------------------------------------------------------------------------------------------------------------------------------------------------------------------------------------------------------------------------------------------------------------------------------------------------------------------------------------------------------------------------------------------------------------------------------------------------------------------------------------------------------------------------------------------------------------------------------------------------------------------------------------------------------------------------------------------------------------------------------------------------------------------------------------------------------------------------------------|----------------------------------------------------------------------------------------------------------------------------------------------------------------------------------------------------------------------------------------------------------------------------------------------------------|
| <p>Amyloidosis</p> <p>Extracapillary glomerulonephritis</p> <p>Cryoglobulinemia</p> <p>Wegener's granulomatosis</p> <p>Acute kidney Injury</p> <p>Other systemic disease</p> <p>Myeloma</p> <p>Ischemic nephropathy, cholesterol<br/>Embolic disease</p> <p>Lupus nephropathy</p> <p>Vascular nephropathy due to malignant<br/>hypertension</p> <p>Traumatic loss of kidney</p> <p>Rheumatoid purpura</p> <p>Systemic scleroderma</p> <p>Goodpasture syndrome</p> <p>Thrombotic microangiopathy</p> | <p>Kidney agenesis, hypoplasia, dysplasia</p> <p>Morphological abnormality</p> <p>Diabetes</p> <p>Glomerulonephritis with FSGS</p> <p>Membranous glomerulonephritis</p> <p>Membranoproliferative glomerulonephritis</p> <p>Kidney infection</p> <p>Hereditary kidney disease</p> <p>Tubulointerstitial nephritis due to<br/>neurological bladder</p> <p>Tubulointerstitial nephritis secondary to<br/>lithiasis</p> <p>Tubulointerstitial nephritis due to acquired<br/>obstructive uropathy</p> <p>Tubulointerstitial nephritis due to congenital<br/>obstructive uropathy</p> <p>Other tubulointersitial nephritis</p> <p>Nephrocalcinosis</p> <p>CKD due to vesicoureteral reflux</p> <p>Hereditary nephropathy with deafness</p> <p>Vascular nephropathy due to hypertension</p> <p>IgA nephropathy</p> <p>Primary oxalosis</p> <p>Cystic disease</p> <p>Polycystic kidney</p> <p>Renal tuberculosis</p> <p>Tubulopathies (Dent, Lowe, Barter...)</p> <p>Renal or urinary tract cancer</p> | <p>Glomerulonephritis without histological<br/>examination</p> <p>Glomerulonephritis with another<br/>histological diagnosis</p> <p>Secondary glomerular nephritis</p> <p>Unknown</p> <p>Vascular nephropathy from other cause</p> <p>Vascular nephropathy, unprecise cause</p> <p>Toxic nephropathy</p> |

CKD: chronic kidney disease; FSGS: focal segmental glomerulosclerosis, IgA: immunoglobulin A.
